# Supplementary material for: The effect of PU.1 knockdown on gene expression and function of mast cells
Source: PubMed Central journal article supplement (PMC5792452; doi:10.1038/s41598-018-19378-y), 2018-01-31
Supplement: 41598_2018_19378_MOESM1_ESM.pdf [file 41598_2018_19378_MOESM1_ESM.pdf]

**The effect of PU.1 knockdown on gene expression and function of mast cells**

**Yoshihito Oda, Kazumi Kasakura, Izumi Fujigaki, Azusa Kageyama,  
Ko Okumura, Hideoki Ogawa, Takuya Yashiro, and Chiharu Nishiyama**

Department of Biological Science and Technology,

Faculty of Industrial Science and Technology, Tokyo University of Science,

6-3-1 Nijjuku, Katsushika-ku, Tokyo 125-8585, Japan

Atopy (Allergy) Research Center, Juntendo University School of Medicine, 2-1-1

Hongo, Bunkyo-ku, Tokyo 113-8421, Japan

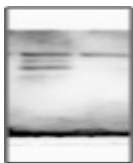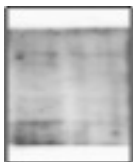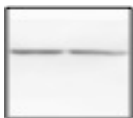

Full-length blots stained by anti-PU.1 Ab (top), anti-Syk Ab (middle), and anti-actin Ab (bottom), whose cropped profiles were shown in Fig. 1E.

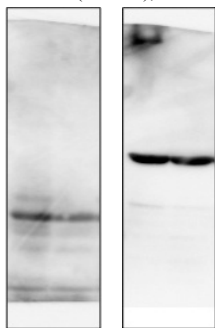

Full-length blots stained by anti-FcεRIβ Ab (left), anti-actin Ab (right), whose cropped profiles were shown in Fig. 1E.

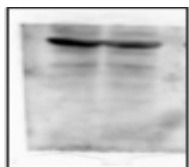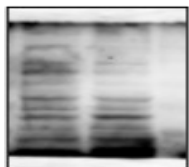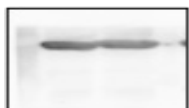

Full-length blots stained by anti-IRF4 Ab (top), anti-Syk Ab (middle), and anti-actin Ab (bottom), whose cropped profiles were shown in Fig. 2B.

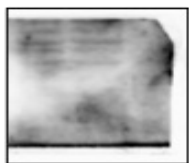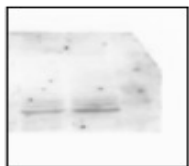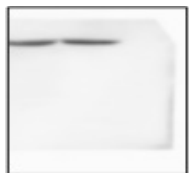

Full-length blots stained by anti-IRF8 Ab (top), anti-Syk Ab (middle), and anti-actin Ab (bottom), whose cropped profiles were shown in Fig. 2C.

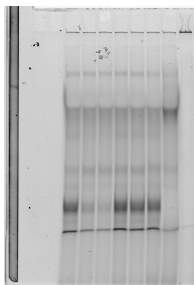

Full-length with the lowest-contrast gel profile of EMSA data (Fig. 3D).

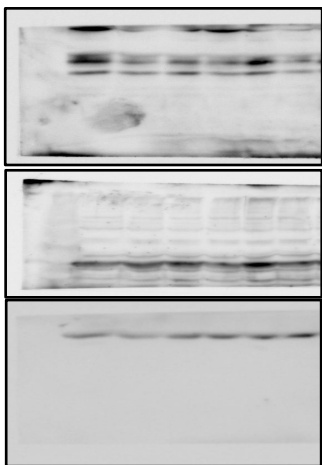

Full-length blots stained by anti-PU.1 Ab (top), anti-Syk Ab (middle), and anti-actin Ab (bottom), whose cropped profiles were shown in Fig. 5B.
